# Supplementary material for: Position and orientational preferences of drug-like compounds in lipid membranes: a computational and NMR approach
Source: Royal Society of Chemistry journal article supplement (doi:10.1039/c5cp03218k), 2015-01-01

## SUPPORTING INFORMATION FOR MA ET AL.

**SI Figure 1.** PMF profiles of amitriptyline and clozapine in DMPC, DPPC and POPC bilayers as a function of protonation state. Center of the bilayer is located at  $z=0$ . Error bars indicate statistical errors estimated by the bayesian bootstrap analysis implemented in *g\_wham* (part of the GROMACS package)

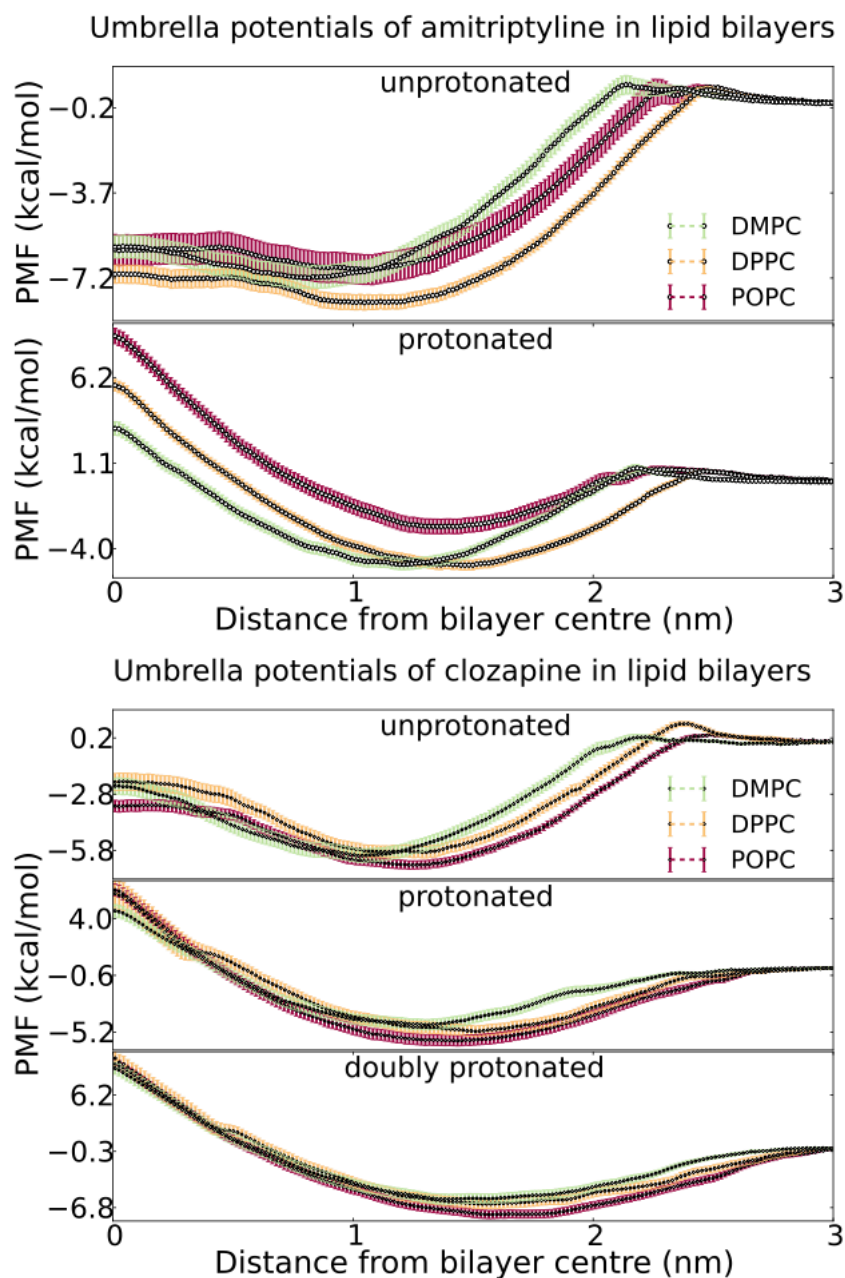

Supplement: c5cp03218k1.pdf [file c5cp03218k1.pdf]
